# Supplementary material
Source: PubMed Central journal article supplement (PMC4176317)
Supplement: cn500147v_si_001.pdf [file cn500147v_si_001.pdf]

# **Proteasome Activation is a Mechanism for Pyrazalone Small Molecules Displaying Therapeutic Potential in Amyotrophic Lateral Sclerosis**

Paul C. Trippier<sup>a,†</sup>, Kevin Tianmeng Zhao<sup>a</sup>, Susan G. Fox<sup>b</sup>, Isaac T. Schiefer<sup>a</sup>, Radhia Benmohamed<sup>c</sup>, Jason Moran<sup>b</sup>, Donald R. Kirsch<sup>c</sup>, Richard I. Morimoto<sup>b</sup>, and Richard B. Silverman<sup>a,d\*</sup>

<sup>a</sup> Department of Chemistry, Northwestern University, Evanston, Illinois, USA.

<sup>b</sup> Department of Molecular Biosciences, Rice Institute for Biomedical Research, Northwestern University, Evanston, IL, USA.

<sup>c</sup> Cambria Pharmaceuticals, Cambridge, Massachusetts, USA.

<sup>e</sup> Department of Molecular Biosciences, Chemistry of Life Processes Institute, Center for Molecular Innovation and Drug Discovery, Northwestern University, Evanston, IL, USA.

<sup>†</sup> Current address: Department of Pharmaceutical Sciences, Texas Tech University Health Sciences Center, School of Pharmacy, Amarillo, Texas, USA.

\* Corresponding author. Department of Chemistry, Northwestern University, 2145 Sheridan Road, Evanston, IL 60208-3113. Phone: 1-847-491-5653. Fax: 1-847-491-7713. E-mail: Agman@chem.northwestern.edu.

## Contents

- S3. General Experimental Procedures
- S4. Synthetic procedure and characterization of probe compound **BP**
- S5. Supplementary Chart S1: SOD1 Inhibition Assay
- S6. Supplementary Table S1: mGluR<sub>5</sub> Inhibitor Activity Assay in ALS model system
- S7. Cell Culture and Affinity Chromatography Protocol
- S8. Supplementary Figure S1: SDS-PAGE gel of **BP** and all controls
- S9. Supplementary Chart S2: Effect of pyrazolones **1,2** and **BP** to reverse MG132 proteasome inhibition at EC<sub>50</sub> concentration.
- S10. Trypsin digestion and LC/MS/MS procedure
- S11. LC/MS/MS data analysis
- S12. List of protein hits from in solution and in gel digestion
- S14. References

## General Experimental Procedures

All reactions were carried out in oven- or flame-dried glassware open to the air unless otherwise noted. All reactions were monitored by analytical thin layer chromatography using Whatman precoated silica gel glass plates. Visualization was accomplished by UV light (256 nm) or by potassium permanganate and/or phosphomolybdic acid solution as indicator. Flash column chromatography was performed using silica gel 60 (mesh 230-400) supplied by E. Merck. Commercial grade solvents and reagents were obtained from Sigma Aldrich, Pierce Biotechnology, or Alfa Aesar and used without further purification except as indicated. Tetrahydrofuran was distilled from sodium benzophenone ketyl under an atmosphere of dry argon.

$^1\text{H}$ ,  $^{13}\text{C}$ , COSY, HMQC and DEPT NMR spectra were recorded on a Bruker Advance III (500 MHz  $^1\text{H}$ , 125.77 MHz  $^{13}\text{C}$ ) equipped with a DCH Cryo-Probe. Multiplicities are indicated by s (single), d (doublet), dd (doublet of doublets) t (triplet), q (quartet), m (multiplet), br (broad). Chemical shifts are reported in parts per million (ppm,  $\delta$ ) using  $\text{CDCl}_3$  ( $^1\text{H}$  7.26 ppm,  $^{13}\text{C}$  77.36 ppm) and  $\text{MeOH-}d_4$  ( $^1\text{H}$  3.31 ppm,  $^{13}\text{C}$  49.00 ppm) as internal standards. N.O.e experiments were performed on a Varian Inova (500 MHz) or Varian Inova (400 MHz) spectrometer. High resolution mass spectrometry was performed on a VG70-250SE mass spectrometer. High pressure liquid chromatography was performed on a Beckman System Gold chromatograph (Model 125P solvent module and Model 166 detector) with a Vydac (C18, 5 $\mu\text{m}$ , 90 $\text{\AA}$ , 4.6mm x 250mm) column (Grace, Deerfield, IL), all samples were assessed to possess >95% purity.

*N*-(15-(3-((3,5-dichlorophenoxy)methyl)-5-oxo-2,5-dihydro-1*H*-pyrazol-1-yl)-15-oxo-3,6,9,12-

*tetraoxapentadecyl*)-5-((3*aS*,4*S*,6*aR*)-2-oxohexahydro-1*H*-thieno[3,4-*d*]imidazol-4-yl)pentanamide (**BP**)<sup>1</sup>: To a solution of 4-(3,5-dichlorophenoxy)-3-oxobutanoate<sup>1</sup> (26 mg, 0.10 mmol) in DMSO-*d*<sub>6</sub> (4 mL) was added biotin-PEG4-hydrazide (50 mg, 0.10 mmol), and the solution was stirred at room temperature for 7 days. The orange solution was concentrated to provide **BP**, which was analyzed immediately.

<sup>1</sup>H NMR (500 MHz; DMSO-*d*<sub>6</sub>): δ<sub>H</sub>: 1.30 (2H, m, CH<sub>2</sub>), 1.49 (2H, m, CH<sub>2</sub>), 1.60 (2H, m, CH<sub>2</sub>), 2.07 (2H, t, *J* = 7.48Hz, CH<sub>2</sub>C(O)), 2.25 (2H, t, *J* = 6.52Hz CH<sub>2</sub>C(O)), 2.82 (1H, dd, *J* = 5.00 and 7.67Hz, SCHH'), 3.09 (1H, m, SCHH'), 3.18 (2H, q, *J* = 6.33 and 12.00Hz, CH<sub>2</sub>NH), 3.36 (1H, m, SCH), 3.42 (14H, s, OCH<sub>2</sub>CH<sub>2</sub>O), 3.49 (2H, m, OCH<sub>2</sub>CH<sub>2</sub>O), 3.59 (2H, t, *J* = 6.39Hz, OCH<sub>2</sub>CH<sub>2</sub>NH), 4.13 (1H, m, CH<sub>bridging</sub>), 4.19 (2H, s, CH<sub>2</sub>(pyrazolone)), 4.31 (1H, t, *J* = 7.25Hz, CH<sub>bridging</sub>), 5.05 (1H, s, CH<sub>pyrazolone</sub>), 6.40 (2H, d, *J* = 32.10Hz, NH<sub>biotin</sub>), 7.06 (2H, s, ArCH), 7.19 (1H, s, ArCH), 7.87 (1H, t, *J* = 5.48Hz, CH<sub>2</sub>NHC(O)), 9.00 (1H, br. s, NH<sub>pyrazolone</sub>).

<sup>13</sup>C NMR (125.77 MHz; DMSO-*d*<sub>6</sub>): δ<sub>C</sub>: 13.95 (CH<sub>2</sub>), 25.23 (CH<sub>2</sub>), 27.99 (CH<sub>2</sub>), 28.17 (CH<sub>2</sub>), 34.21 (CH<sub>2</sub>C(O)), 35.04 (CH<sub>2</sub>C(O)), 38.39 (CH<sub>2</sub>NH), 45.19 (CH<sub>2</sub>S), 55.40 (CHS), 59.14 CH<sub>bridging</sub>), 60.80 (CH<sub>bridging</sub>), 66.60 (CH<sub>2</sub>CH<sub>2</sub>O), 69.11, 69.46, 69.52, 69.62, 69.66, 69.73 (CH<sub>2</sub>O), 72.32 (CH<sub>2</sub>OAr), 94.40 (CH<sub>pyrazolone</sub>), 113.88 (ArCH), 120.21 (ArCH), 134.50 (ArC-Cl), 162.69 (C(O)<sub>pyrazolone</sub>), 167.00 (ArC-O), 169.48 (C(O)<sub>biotin</sub>), 172.14 (CHC(O)).

*m/z* (ESI): 800.34 [M+EtOH+Na] (47%), 801.4 (16), 804.28 (5).

HRMS (ESI): C<sub>33</sub>H<sub>50</sub>Cl<sub>2</sub>N<sub>5</sub>O<sub>10</sub>S [M+H+EtOH] requires 778.265, Found 778.2659.

**Supplementary Chart S1.** Wild-type SOD1 activity inhibition by selected compounds of the ASP, PYT and CHD classes.

**a. SOD1 Inhibition Assay**

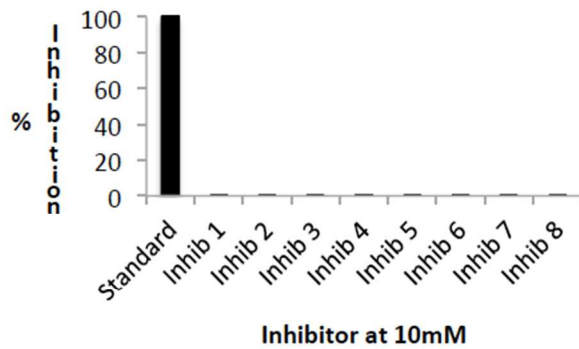

**b. SOD1 Inhibition Assay**

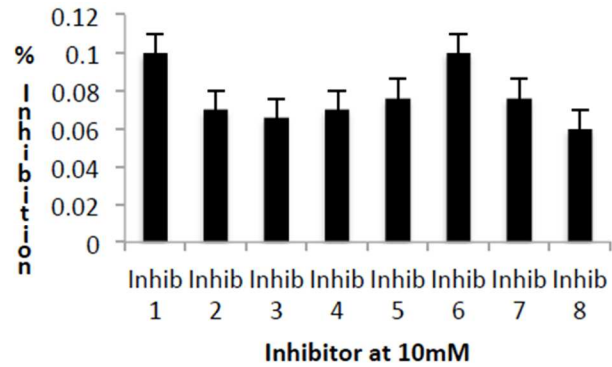

A variety of active compounds in the <sup>G93A</sup>SOD1 cellular assay do not directly inhibit wild-type SOD1. a) Percentage inhibition of wild-type SOD1 by 10mM of the selected inhibitor. b) Expansion of a. Experimental protocol was followed as described in the kit manufacturers guidelines (Cayman Chemical). Standard is 10mM concentration of KCN. Data are represented as mean ± Standard deviation. All data shown are representative of three independent experiments.

**Supplementary Table S1.** Activities of known mGluR inhibitors in ALS cell-based assay.

| Name / Acronym | Structure                                                                           | Target Specificity                         | Known Potency (IC <sub>50</sub> ) | Assay (EC <sub>50</sub> ) |
|----------------|-------------------------------------------------------------------------------------|--------------------------------------------|-----------------------------------|---------------------------|
| ACDPP          | 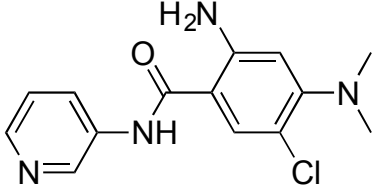   | mGluR <sub>5</sub>                         | Ki = 295 nM                       | > 32 μM                   |
| MPEP           |    | mGluR <sub>5</sub>                         | 36 nM                             | > 32 μM                   |
| Fenobam        |    | mGluR <sub>5</sub>                         | 87 nM                             | > 32 μM                   |
| DFB            |    | mGluR <sub>5</sub>                         | 3-5 fold potentiation             | > 32 μM                   |
| SIB            |   | mGluR <sub>5</sub>                         | 0.4 μM                            | > 32 μM                   |
| LY 456236      |  | mGluR <sub>1</sub>                         | 143 nM                            | > 32 μM                   |
| LY 341495      |  | mGluR <sub>2</sub> /<br>mGluR <sub>3</sub> | 2.3 nM<br>1.3 nM                  | > 32 μM                   |

## **Cell Culture Conditions.**

Cultured PC12-<sup>G93A</sup>SOD1 cell lines were obtained by the published procedure.<sup>2</sup>





**Supplementary Chart S2.** Effect of pyrazolones **1,2** and **BP** to reverse MG132 proteasome inhibition (measured as rate of degradation of fluorogenic proteasome substrate III). Each pyrazolone was dosed at the respective EC<sub>50</sub> value (**1**; 700 nM, **2**; 70 nM, **BP**; 670 nM).

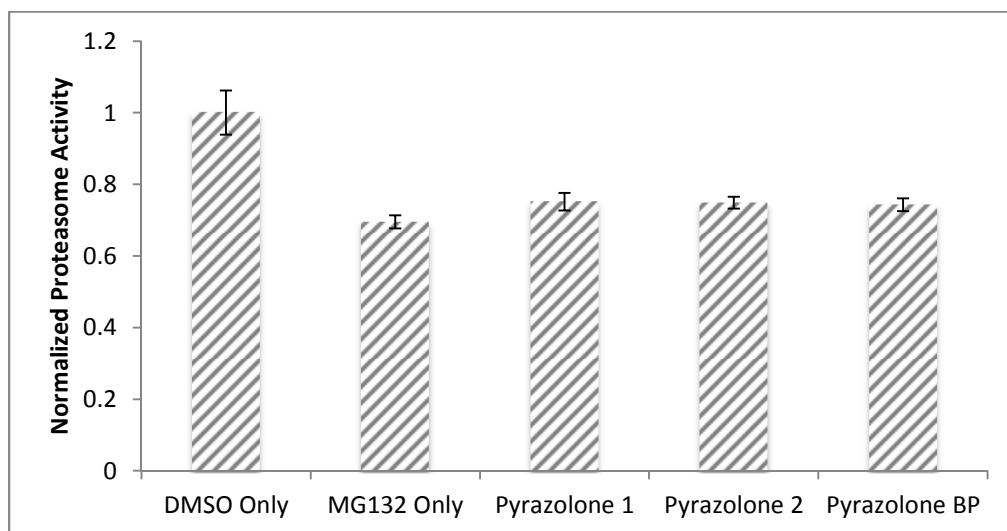

The low S.D. demonstrate that the pyrazolones are indeed reversing the effects of MG132 treatment. An unpaired, two sample, one-tailed, t-test was performed between each compound and the MG132 treated control to determine if a MG132 reversing effect is detected. The p-values calculated are:

| Compound             | p-value     |
|----------------------|-------------|
| Pyrazolone <b>1</b>  | 0.00070025  |
| Pyrazolone <b>2</b>  | 0.00019962  |
| Pyrazolone <b>BP</b> | 0.000875604 |

As each value is below 0.005 a statistical significance exists between each compounds proteasome activity versus MG132 proteasome activity.

## Trypsin Digestion and LC/MS/MS

In-gel trypsin digestion was done following a published protocol.<sup>3</sup>

50 uL of protein from beads with inhibitor and blocked beads were run on a 4-20% precast biorad mini protean gel. 10 bands from each lane between 5 and 250 kDals were excised and trypsinized. Additionally, in solution digests of both samples without prior protein separation were performed. In both cases, the treated peptides were subsequently separated on a self-packed nanocapillary column (5  $\mu$ m Jupiter C18, 100 mm  $\times$  75  $\mu$ m) using a Dionex UltiMate 3000 RSLCnano system (Thermo Scientific). LC solvents included 5% acetonitrile in water with 0.1% formic acid (mobile phase A) and 95% acetonitrile with 0.1% formic acid (mobile phase B). The LC gradient was set as follows: 0 min, 0% B; 55 min, 45% B; 63 min, 80% B; 67 min, 0% B with re-equilibration of 0% B until 90 min. Peptides were eluted into a nanoelectrospray ionization (nESI) source on a Velos Pro Orbitrap mass spectrometer (Thermo Fisher Scientific). Peptides were first detected in an orbitrap cell with resolving power setting of 30000 (at 400 m/z). Intact peptide data were collected in the 400\_2000 m/z range, and MS/MS spectra were acquired using data dependent mode where the top ten most abundant peaks from the FTMS full scan were selected for collision induced dissociation (CID) fragmentation followed by mass analysis of the fragment ions in the linear ion trap.

## LC/MS/MS Data Analysis

LC/MS/MS raw data files were converted to mgf files by Compass 1.0.4.0, assuming precursor charge states of 2+, 3+ and 4+.<sup>4</sup> The mgf files generated were searched against the SwissProt rat database using Macot ([www.matrixscience.com](http://www.matrixscience.com) or Electrophoresis, 20(18) 3551-67 (1999)). The following parameters were applied during database searching: 12 ppm precursor mass error tolerance, peptide charge states allowed were 2+ to 4+ and 0.5 Da fragment mass error tolerance. Variable modifications included carbamidomethylation for cysteines (+57 Da) and oxidation of methionines (+16 Da); two missed cleavage sites and two variable modification combinations were allowed. Result files were then compiled and compared using Scaffold 3 (<http://www.proteomesoftware.com>).<sup>5</sup>

## List of Protein Hits

ratALS090512

| #   | Identified Proteins (141)                                                              | Accession # | Mw (kDa) | Probability |
|-----|----------------------------------------------------------------------------------------|-------------|----------|-------------|
| 49  | Synaptic vesicle membrane protein VAT-1 homolog OS=Rattus norvegicus GN=Vat1 PE=1 SV=1 | Q3MIE4      | 43       | 100%        |
| 53  | ATP synthase subunit beta, mitochondrial OS=Rattus norvegicus GN=Atp5b PE=1 SV=2       | P10719      | 56       | 100%        |
| 66  | Aconitate hydratase, mitochondrial OS=Rattus norvegicus GN=Aco2 PE=1 SV=2              | Q9ER34      | 85       | 100%        |
| 72  | Fatty acid synthase OS=Rattus norvegicus GN=Fasn PE=1 SV=3                             | P12785      | 272      | 100%        |
| 73  | Extended synaptotagmin-1 OS=Rattus norvegicus GN=Esy1 PE=2 SV=1                        | Q9Z1X1      | 121      | 100%        |
| 74  | ATP synthase subunit alpha, mitochondrial OS=Rattus norvegicus GN=Atp5a1 PE=1 SV=2     | P15999      | 60       | 100%        |
| 75  | Profilin-1 OS=Rattus norvegicus GN=Pfn1 PE=1 SV=2                                      | P62963      | 15       | 100%        |
| 76  | Aldose reductase OS=Rattus norvegicus GN=Akr1b1 PE=1 SV=3                              | P07943      | 36       | 100%        |
| 83  | 26S protease regulatory subunit 4 OS=Rattus norvegicus GN=Psmc1 PE=2 SV=1              | P62193      | 49       | 100%        |
| 87  | Adenosylhomocysteinase OS=Rattus norvegicus GN=Ahcy PE=1 SV=3                          | P10760      | 47       | 100%        |
| 88  | Annexin A6 OS=Rattus norvegicus GN=Anxa6 PE=1 SV=2                                     | P48037      | 75       | 100%        |
| 94  | T-complex protein 1 subunit alpha OS=Rattus norvegicus GN=Tcp1 PE=1 SV=1               | P28480      | 60       | 100%        |
| 95  | T-complex protein 1 subunit epsilon OS=Rattus norvegicus GN=Cct5 PE=1 SV=1             | Q68FQ0      | 59       | 100%        |
| 96  | Syntaxin-binding protein 1 OS=Rattus norvegicus GN=Stxbp1 PE=1 SV=1                    | P61765      | 67       | 100%        |
| 97  | 26S protease regulatory subunit 6B OS=Rattus norvegicus GN=Psmc4 PE=1 SV=1             | Q63570      | 47       | 100%        |
| 98  | 40S ribosomal protein S6 OS=Rattus norvegicus GN=Rps6 PE=1 SV=1                        | P62755      | 29       | 100%        |
| 99  | Calpain-2 catalytic subunit OS=Rattus norvegicus GN=Capn2 PE=1 SV=3                    | Q07009      | 80       | 100%        |
| 100 | Rab GDP dissociation inhibitor alpha OS=Rattus norvegicus GN=Gdi1 PE=1 SV=1            | P50398      | 50       | 100%        |
| 101 | Nucleolin OS=Rattus norvegicus GN=Ncl PE=1 SV=3                                        | P13383      | 77       | 100%        |
| 102 | Peroxisomal multifunctional enzyme type 2 OS=Rattus norvegicus GN=Hsd17b4 PE=1 SV=3    | P97852      | 79       | 100%        |
| 108 | 40S ribosomal protein S3a OS=Rattus norvegicus GN=Rps3a PE=1 SV=2                      | P49242      | 30       | 100%        |
| 109 | Aspartate--tRNA ligase, cytoplasmic OS=Rattus norvegicus GN=Dars PE=2 SV=1             | P15178      | 57       | 100%        |
| 111 | Microtubule-associated protein 4 OS=Rattus norvegicus GN=Map4 PE=1 SV=1                | Q5M7W5      | 110      | 100%        |
| 112 | 60S ribosomal protein L8 OS=Rattus norvegicus GN=Rpl8 PE=2 SV=2                        | P62919      | 28       | 100%        |
| 113 | Histidine triad nucleotide-binding protein 1 OS=Rattus norvegicus GN=Hint1 PE=1 SV=5   | P62959      | 14       | 100%        |
| 114 | Nischarin OS=Rattus norvegicus GN=Nisch PE=2 SV=2                                      | Q4G017      | 166      | 100%        |

|     |                                                                                                                 |        |     |      |
|-----|-----------------------------------------------------------------------------------------------------------------|--------|-----|------|
| 117 | Atlastin-1 OS=Rattus norvegicus GN=Atl1 PE=1 SV=1                                                               | Q6PST4 | 63  | 100% |
| 118 | Hypoxia up-regulated protein 1 OS=Rattus norvegicus GN=Hyou1 PE=1 SV=1                                          | Q63617 | 111 | 100% |
| 119 | Myosin-10 OS=Rattus norvegicus GN=Myh10 PE=1 SV=1                                                               | Q9JLT0 | 229 | 100% |
| 120 | Arginine--tRNA ligase, cytoplasmic OS=Rattus norvegicus GN=Rars PE=1 SV=2                                       | P40329 | 76  | 100% |
| 121 | Tryptophan--tRNA ligase, cytoplasmic OS=Rattus norvegicus GN=Wars PE=1 SV=2                                     | Q6P7B0 | 54  | 100% |
| 122 | Coatomer subunit gamma-1 OS=Rattus norvegicus GN=Copg1 PE=2 SV=1                                                | Q4AEF8 | 98  | 100% |
| 123 | Peptidyl-prolyl cis-trans isomerase FKBP1A OS=Rattus norvegicus GN=Fkbp1a PE=1 SV=3                             | Q62658 | 12  | 100% |
| 124 | Large neutral amino acids transporter small subunit 1 OS=Rattus norvegicus GN=Slc7a5 PE=1 SV=2                  | Q63016 | 56  | 100% |
| 125 | Electron transfer flavoprotein-ubiquinone oxidoreductase, mitochondrial OS=Rattus norvegicus GN=Etfdh PE=2 SV=1 | Q6UPE1 | 68  | 100% |
| 126 | Polyadenylate-binding protein 1 OS=Rattus norvegicus GN=Pabpc1 PE=2 SV=1                                        | Q9EPH8 | 71  | 100% |
| 128 | Coatomer subunit delta OS=Rattus norvegicus GN=Arcn1 PE=2 SV=1                                                  | Q66H80 | 57  | 100% |
| 129 | Septin-11 OS=Rattus norvegicus GN=Sept11 PE=1 SV=1                                                              | B3GNI6 | 50  | 100% |
| 130 | Glutamate dehydrogenase 1, mitochondrial OS=Rattus norvegicus GN=Glud1 PE=1 SV=2                                | P10860 | 61  | 100% |
| 131 | 40S ribosomal protein S11 OS=Rattus norvegicus GN=Rps11 PE=1 SV=3                                               | P62282 | 18  | 100% |
| 132 | Transgelin-2 OS=Rattus norvegicus GN=Tagln2 PE=1 SV=1                                                           | Q5XFX0 | 22  | 100% |
| 133 | Profilin-2 OS=Rattus norvegicus GN=Pfn2 PE=1 SV=3                                                               | Q9EPC6 | 15  | 100% |
| 134 | Phosphatidylinositide phosphatase SAC1 OS=Rattus norvegicus GN=Sacm1l PE=1 SV=1                                 | Q9ES21 | 67  | 100% |
| 135 | Drebrin-like protein OS=Rattus norvegicus GN=Dbnl PE=1 SV=1                                                     | Q9JHL4 | 49  | 100% |
| 136 | Aminopeptidase B OS=Rattus norvegicus GN=Rnpep PE=1 SV=2                                                        | O09175 | 72  | 100% |
| 137 | 6-phosphofructokinase, liver type OS=Rattus norvegicus GN=Pfkl PE=2 SV=3                                        | P30835 | 85  | 100% |
| 138 | Very long-chain specific acyl-CoA dehydrogenase, mitochondrial OS=Rattus norvegicus GN=Acadvl PE=1 SV=1         | P45953 | 71  | 100% |
| 139 | Alanine--tRNA ligase, cytoplasmic OS=Rattus norvegicus GN=Aars PE=1 SV=3                                        | P50475 | 107 | 100% |
| 140 | Translation initiation factor eIF-2B subunit delta OS=Rattus norvegicus GN=Eif2b4 PE=2 SV=1                     | Q63186 | 58  | 100% |
| 141 | Nuclear autoantigenic sperm protein OS=Rattus norvegicus GN=Nasp PE=2 SV=1                                      | Q66HD3 | 84  | 100% |

## References

- (1) Trippier, P. C.; Benmohammed, R.; Kirsch, D. R.; Silverman, R. B. *Bioorg. Med. Chem. Lett.* **2012**, *22*, 6647.
- (2) Matsumoto, G.; Stojanovic, A.; Holmberg, C. I.; Kim, S.; Morimoto, R. I. *J. Cell. Biol.* **2005**, *171*, 75.
- (3) Shevchenko, A.; Tomas, H.; Havlis, J.; Olsen, J. V.; Mann, M. *Nat. Protoc.* **2006**, *1*, 2856.
- (4) Wenger, C. D.; Phanstiel, D. H.; Lee, M. V.; Bailey, D. J.; Coon, J. J. *Proteomics* **2011**, *11*, 1064.
- (5) Searle, B. C. *Proteomics* **2010**, *10*, 1265.
